# Supplementary material
Source: ML conference proceedings conference paper supplement (https://proceedings.mlr.press/v38/atan15.html)
Supplement: Supplementary file [file atan15-supp.pdf]

# Supplementary Material of Global Multi-armed Bandits with Hölder Continuity

**Onur Atan**  
UCLA

**Cem Tekin**  
UCLA

**Mihaela van der Schaar**  
UCLA

**Lemma 1.** *Given any  $\theta_* \in \Theta$ , there exists a constant  $\epsilon_{\theta_*} = \delta_{\min}(\theta_*)^{1/\gamma_2}/(2D_2)^{1/\gamma_2}$ , where  $D_2$  and  $\gamma_2$  are the constants given in Assumption 1 such that  $\Delta_{\min}(\theta_*) \geq \epsilon_{\theta_*}$ . In other words, the minimum sub-optimality distance is always positive.*

*Proof.* For any suboptimal arm  $k \in \mathcal{K} - k^*(\theta)$ , we have  $\mu_{k^*(\theta)}(\theta) - \mu_k(\theta) \geq \delta_{\min}(\theta) > 0$ . We also know that  $\mu_k(\theta') \geq \mu_{k^*(\theta)}(\theta')$  for all  $\theta' \in \Theta_k$ . Hence for any  $\theta' \in \Theta_k$  at least one of the following should hold: (i)  $\mu_k(\theta') \geq \mu_k(\theta) - \delta_{\min}(\theta)/2$ , (ii)  $\mu_{k^*(\theta)}(\theta') \leq \mu_{k^*(\theta)}(\theta) + \delta_{\min}(\theta)/2$ . If both of the below does not hold, then we must have  $\mu_k(\theta') < \mu_{k^*(\theta)}(\theta')$ , which is false. This implies that we either have  $\mu_k(\theta) - \mu_k(\theta') \leq \delta_{\min}(\theta)/2$  or  $\mu_{k^*(\theta)}(\theta) - \mu_{k^*(\theta)}(\theta') \geq -\delta_{\min}(\theta)/2$ , or both. Recall that from Assumption 1 we have  $|\theta - \theta'| \geq |\mu_k(\theta) - \mu_k(\theta')|^{1/\gamma_2}/D_2^{1/\gamma_2}$ . This implies that  $|\theta - \theta'| \geq \epsilon_{\theta}$  for all  $\theta' \in \Theta_k$ .  $\square$

**Lemma 2.** *Consider a run of the greedy policy until time  $t$ . Then, the following relation between  $\hat{\theta}_t$  and  $\theta_*$  holds with probability one:  $|\hat{\theta}_t - \theta_*| \leq \sum_{k=1}^K w_k(t)D_1|\hat{X}_{k,t} - \mu_k(\theta_*)|^{\gamma_1}$*

*Proof.* Assumption 2 ensures that the reward functions are either monotonically increasing or decreasing. We generate imaginary functions that are  $\mu_k(\theta) = \tilde{\mu}_k(\theta)$  for  $\theta \in \Theta$  and for  $y, y' \in [0, 1]$ ,

$$|\tilde{\mu}_k^{-1}(y) - \tilde{\mu}_k^{-1}(y')| \leq D_1|y - y'|^{\gamma_1} \quad (1)$$

We have also  $\tilde{\mu}_k^{-1}(y) > 1$  when  $y > \max_{\theta \in \Theta} \mu_k(\theta)$  and  $\tilde{\mu}_k^{-1}(y) < 0$  when  $y < \min_{\theta \in \Theta} \mu_k(\theta)$ . Then,

$$\begin{aligned} |\theta_* - \hat{\theta}_t| &= \left| \sum_{k=1}^K w_k(t)\hat{\theta}_{k,t} - \theta_* \right| \\ &= \sum_{k=1}^K w_k(t)|\theta_* - \hat{\theta}_{k,t}| \\ &\leq \sum_{k=1}^K w_k(t)|\tilde{\mu}_k^{-1}(\hat{X}_{k,t}) - \tilde{\mu}_k^{-1}(\tilde{\mu}_k(\theta_*))| \end{aligned}$$

$$\leq \sum_{k=1}^K w_k(t)D_1|\hat{X}_{k,t} - \mu_k(\theta_*)|^{\gamma_1}, \quad (2)$$

where we need to look at following two cases for the first inequality. The first case is  $\hat{X}_{k,t} \in \mathcal{Y}_k$  where the statement immediately follows. The second case is  $\hat{X}_{k,t} \notin \mathcal{Y}_k$ , the global parameter estimator  $\hat{\theta}_{k,t}$  is either 0 or 1.  $\square$

**Lemma 3.** *For given global parameter  $\theta_*$ , the one step regret of the greedy policy is bounded by  $r_t(\theta_*) = \mu^*(\theta_*) - \mu_{I_t}(\theta_*) \leq 2D_2|\theta_* - \hat{\theta}_t|^{\gamma_2}$  with probability 1, where  $I_t$  is the arm selected by the greedy policy at time  $t \geq 2$ .*

*Proof.* Note that  $I_t \in \arg \max_{k \in \mathcal{K}} \mu_k(\hat{\theta}_t)$ . Therefore, we have

$$\mu_{I_t}(\hat{\theta}_t) - \mu_{k^*(\theta_*)}(\hat{\theta}_t) \geq 0. \quad (3)$$

We have  $\mu^*(\theta_*) = \mu_{k^*(\theta_*)}(\theta_*)$ . Then, we can bound

$$\begin{aligned} &\mu^*(\theta_*) - \mu_{I_t}(\theta_*) \\ &= \mu_{k^*(\theta_*)}(\theta_*) - \mu_{I_t}(\theta_*) \\ &\leq \mu_{k^*(\theta_*)}(\theta_*) - \mu_{I_t}(\theta_*) + \mu_{I_t}(\hat{\theta}_t) - \mu_{k^*(\theta_*)}(\hat{\theta}_t) \\ &= \mu_{k^*(\theta_*)}(\theta_*) - \mu_{k^*(\theta_*)}(\hat{\theta}_t) + \mu_{I_t}(\hat{\theta}_t) - \mu_{I_t}(\theta_*) \\ &\leq 2D_2|\theta_* - \hat{\theta}_t|^{\gamma_2} \end{aligned} \quad (4)$$

, where the first inequality followed by inequality 3 and second inequality by Assumption 1.  $\square$

**Lemma 4.** *For any  $t \geq 2$  and given global parameter  $\theta_*$ , we have  $\mathcal{G}_{\theta_*, \hat{\theta}_t}^x \subseteq \cup_{k=1}^K \mathcal{F}_{\theta_*, \hat{\theta}_t}^k((\frac{x}{D_1})^{\frac{1}{\gamma_1}})$  with probability 1.*

*Proof.*

$$\begin{aligned} &\{|\theta_* - \hat{\theta}_t| \geq x\} \\ &\subseteq \left\{ \sum_{k=1}^K w_k(t)D_1|\hat{X}_{k,t} - \mu_k(\theta_*)|^{\gamma_1} \geq x \right\} \\ &\subseteq \cup_{k=1}^K \{w_k(t)D_1|\hat{X}_{k,t} - \mu_k(\theta_*)|^{\gamma_1} \geq w_k(t)x\} \end{aligned}$$

$$= \cup_{k=1}^K \{ |\hat{X}_{k,t} - \mu_k(\theta_*)| \geq (\frac{x}{D_1})^{\frac{1}{\gamma_1}} \} \quad (5)$$

, where the first inequality followed by Lemma 2 and second inequality by the fact that  $\sum_{k=1}^K w_k(t) = 1$ .  $\square$
